# Supplementary material for: Synthesis of D-Limonene Loaded Polymeric Nanoparticles with Enhanced Antimicrobial Properties for Potential Application in Food Packaging
Source: MDPI journal article supplement (doi:10.3390/nano11010191), 2021-01-13
Supplement: s1 [file s1]

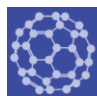

## Supplementary Materials

# Synthesis of D-Limonene Loaded Polymeric Nanoparticles with Enhanced Antimicrobial Properties for Potential Application in Food Packaging

Eleftherios G. Andriotis <sup>1</sup>, Rigini M. Papi <sup>2</sup>, Adamantini Paraskevopoulou <sup>3</sup> and Dimitris S. Achilias <sup>1,\*</sup>

<sup>1</sup> Laboratory of Polymer and Dyes Chemistry and Technology, Department of Chemistry, Aristotle University of Thessaloniki, 54124 Thessaloniki, Greece; andrioti@auth.gr

<sup>2</sup> Laboratory of Biochemistry, Department of Chemistry, Aristotle University of Thessaloniki, 54124Thessaloniki, Greece; rigini@chem.auth.gr

<sup>3</sup> Laboratory of Food Chemistry and Technology, School of Chemistry, Aristotle University of Thessaloniki, 54124 Thessaloniki, Greece; adparask@chem.auth.gr

\* Correspondence: axilias@chem.auth.gr; Tel.: +30-2310-997822

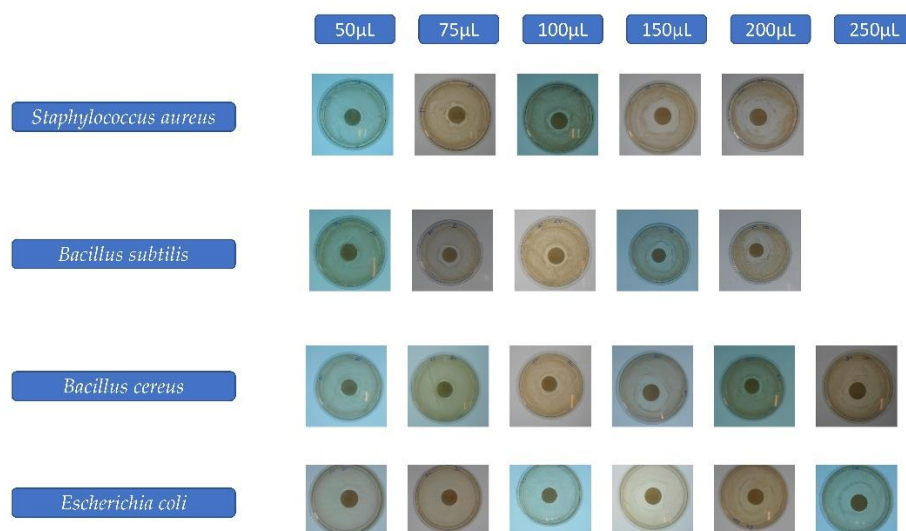

**Figure S1.** Antimicrobial activity assessment of the synthesized nanoparticles, against four microorganisms of interest. The test was performed in the presence of 50, 75, 100, 200, and 250  $\mu\text{L}$  of 10% w/v nanoparticle suspension in ddH<sub>2</sub>O.
